# Supplementary material
Source: MDPI journal article supplement (https://www.mdpi.com/2076-3417/10/24/9120)
Supplement: s1 [file s1]

(a)

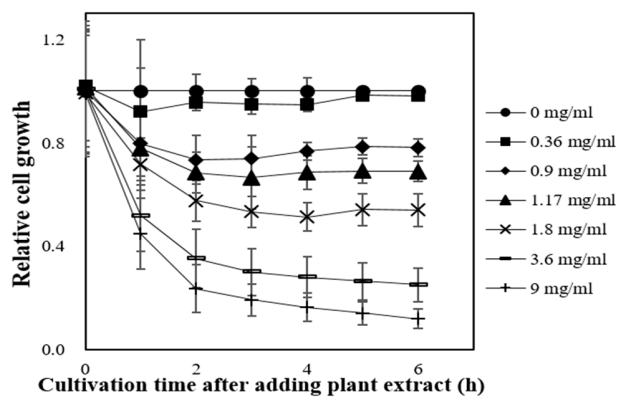

(b)

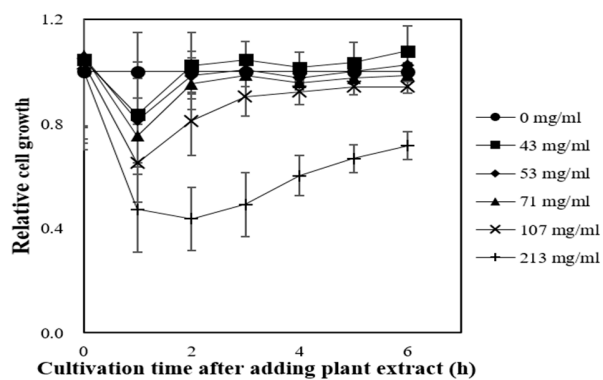

(c)

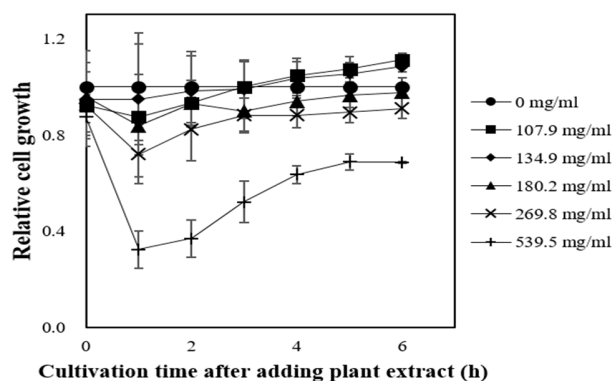

**Figure S1.** Inactivation rate of *M. luteus* vs. time for (a) tea-tree oil, (b) rosemary, and (c) garlic extracts for various extract solution concentrations.

(a)

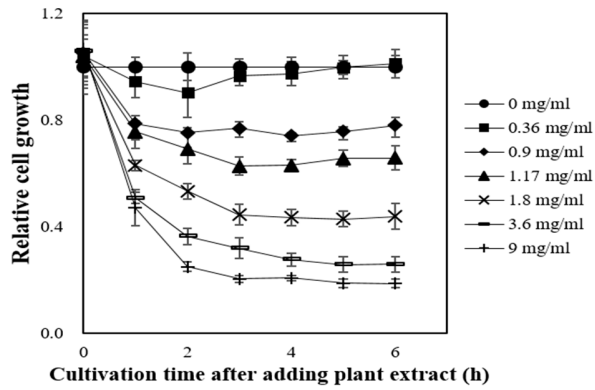

(b)

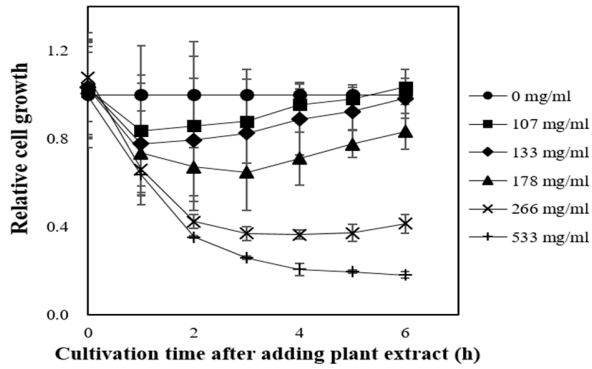

(c)

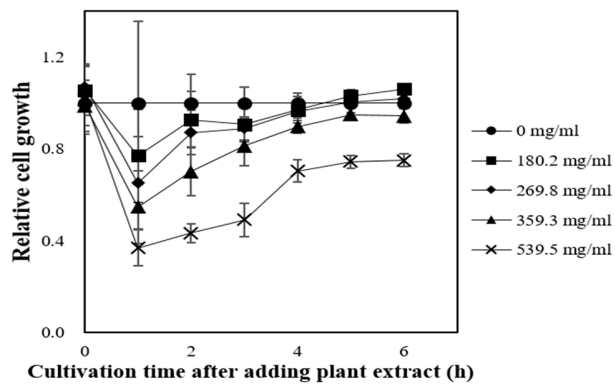

**Figure S2.** Inactivation rate of *E. coli* vs. time for (a) tea-tree oil, (b) rosemary, and (c) garlic extracts for various extract solution concentrations.

(a)

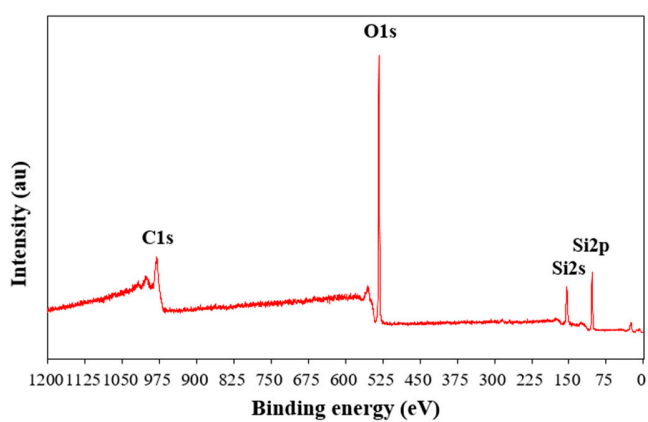

(b)

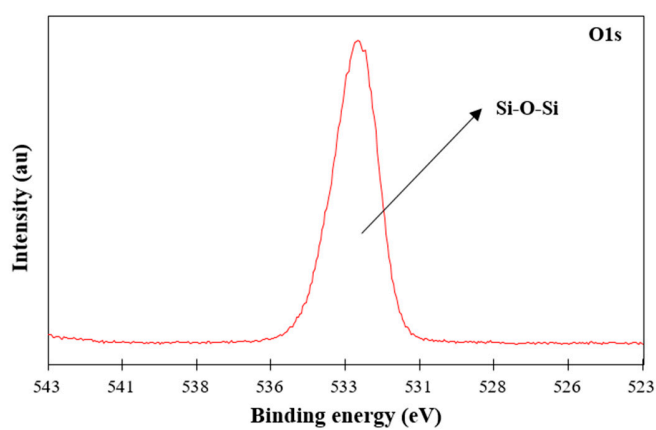

(c)

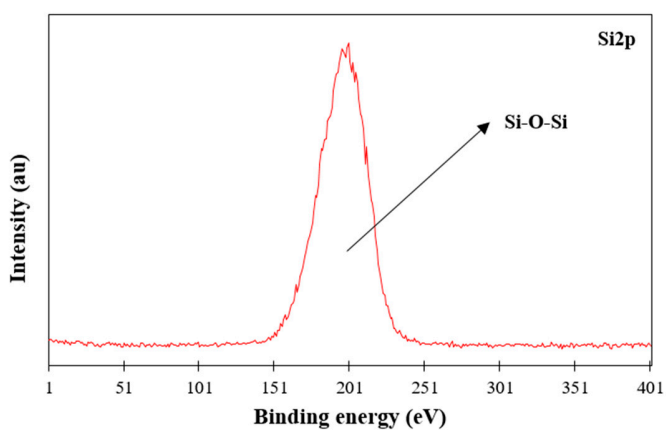

**Figure S3.** XPS spectra of the silicate polymer coating layer: (a) survey spectra, (b) O1s, and (c) Si2p.

(a)

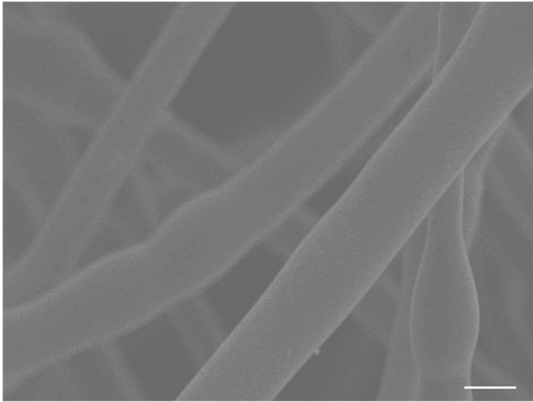

(b)

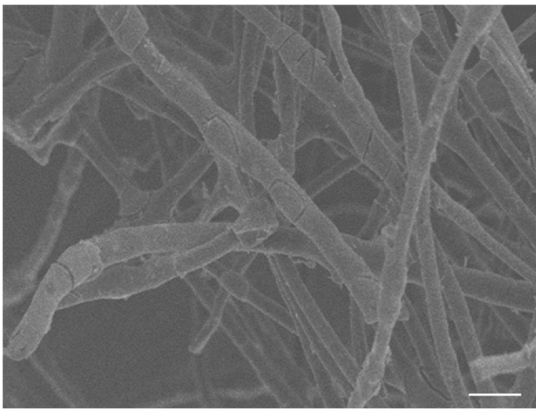

(c)

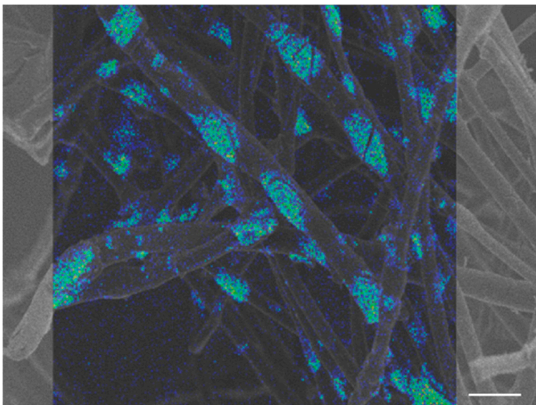

**Figure S4.** Scanning electron micrographs of the (a) pristine (control) and (b) tea tree oil-coated filters at a concentration of 9 mg/ml, and (c) results of Si mapping. Bars indicate (a) 33.3 $\mu$ m and (b)(c) 100 $\mu$ m.

(a)

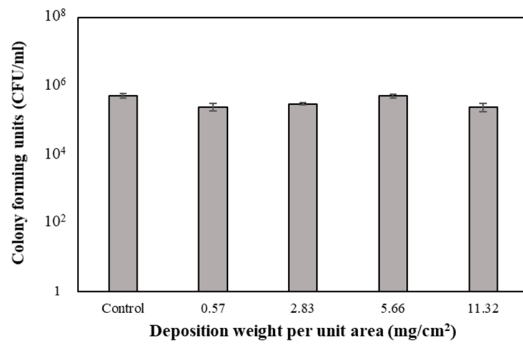

(b)

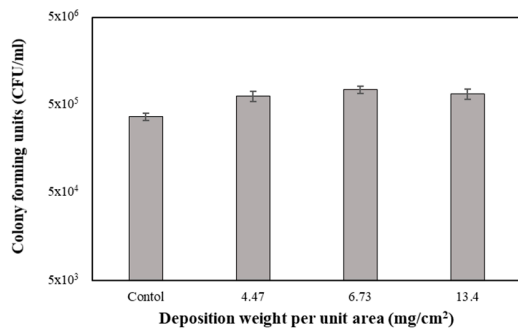

(c)

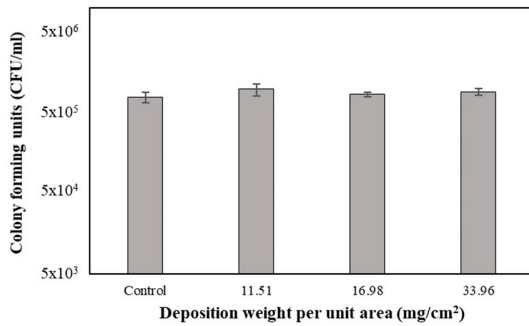

**Figure S5.** Colony-forming units of *M. luteus*, immediately after bioaerosol exposure, vs. weight of plant extract per unit area: (a) tea-tree oil, (b) rosemary, and (c) garlic.
